# Supplementary material for: Development and characterisation of an expressed sequence tags (EST)-derived single nucleotide polymorphisms (SNPs) resource in rainbow trout
Source: PubMed Central journal article supplement (PMC3536561; doi:10.1186/1471-2164-13-238), 2012-06-13

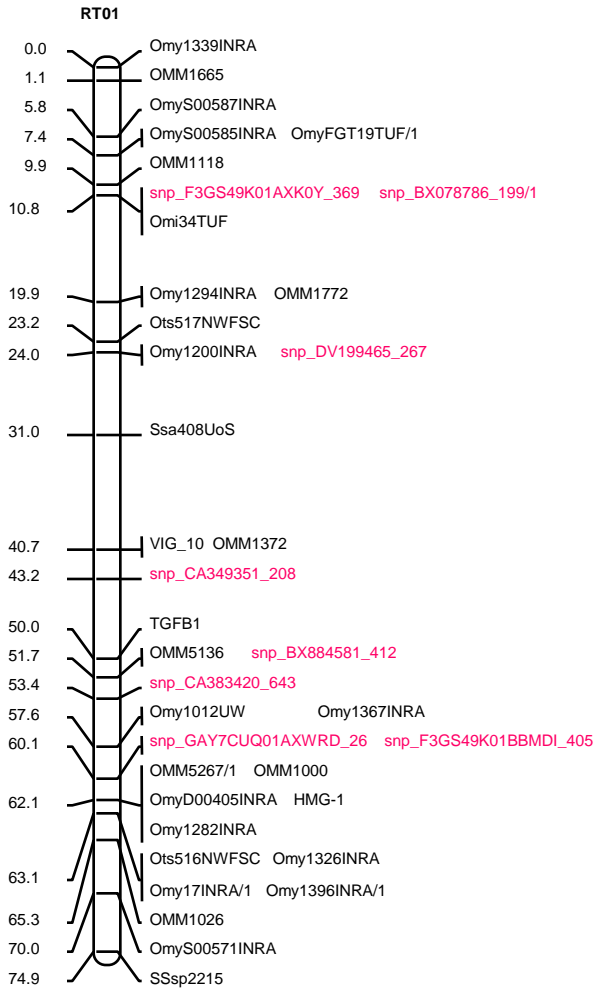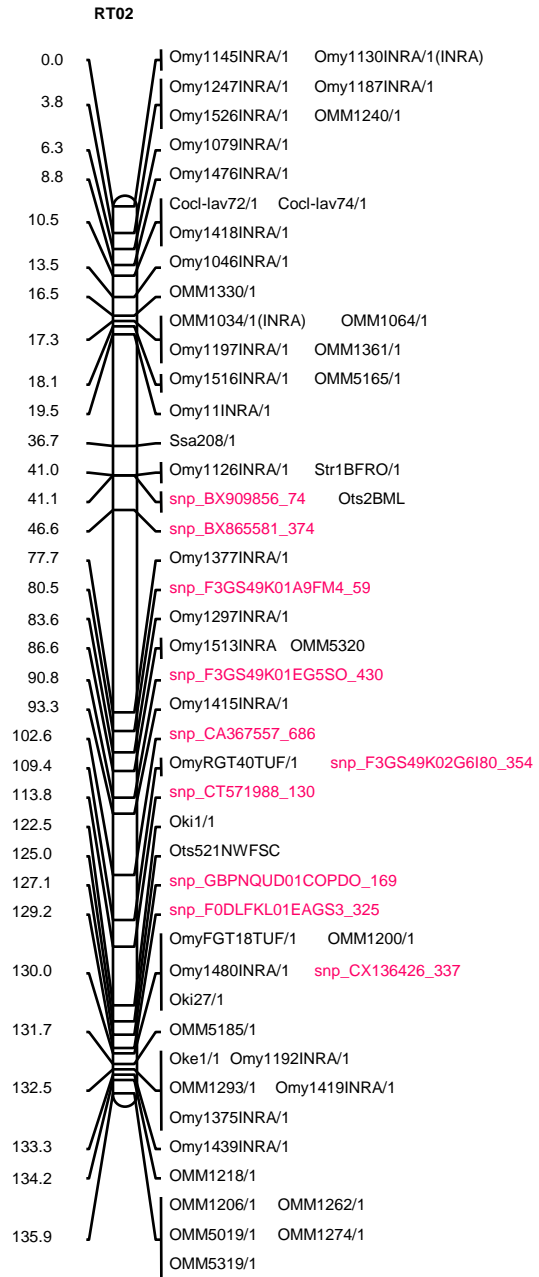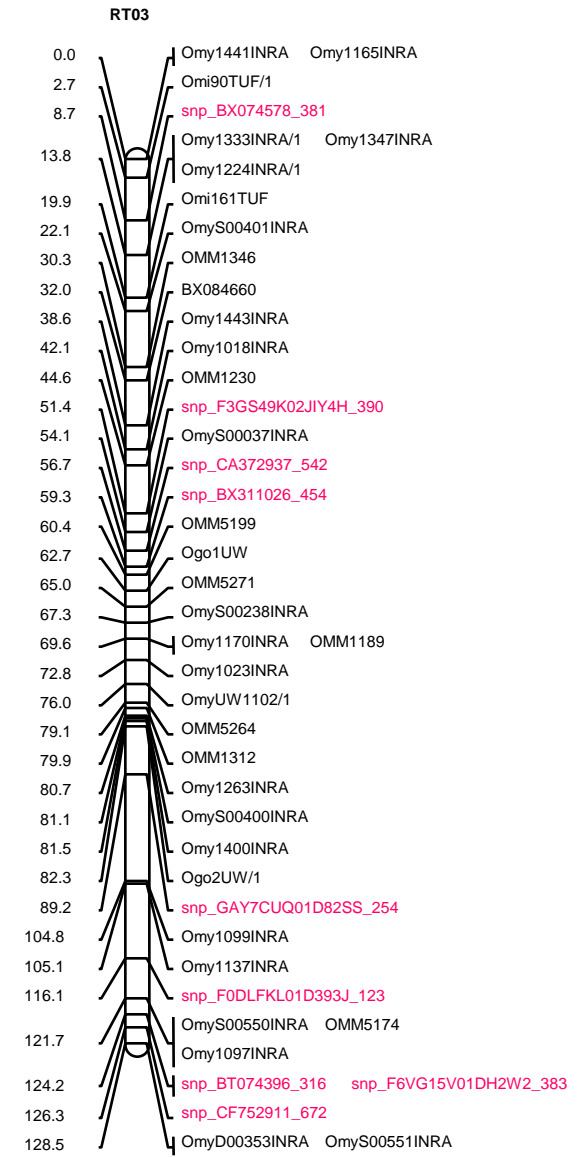

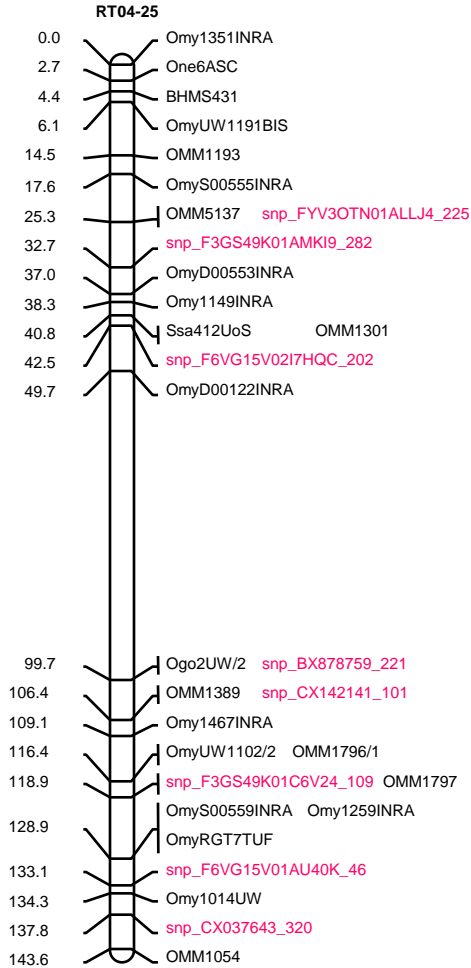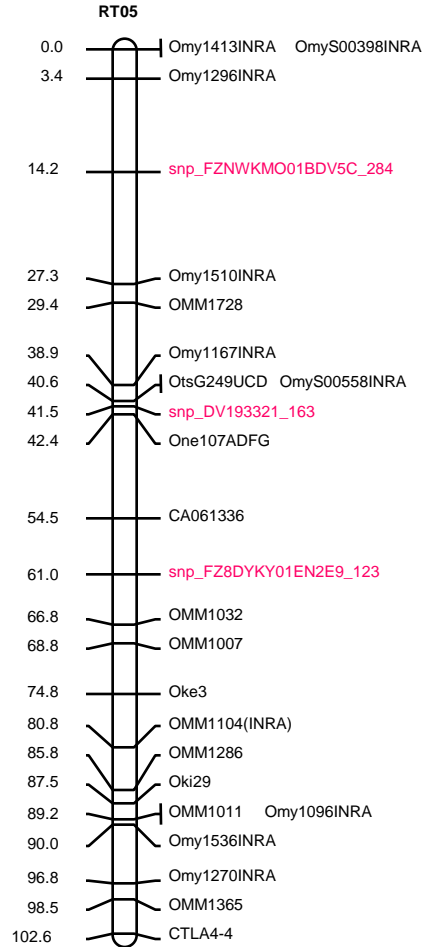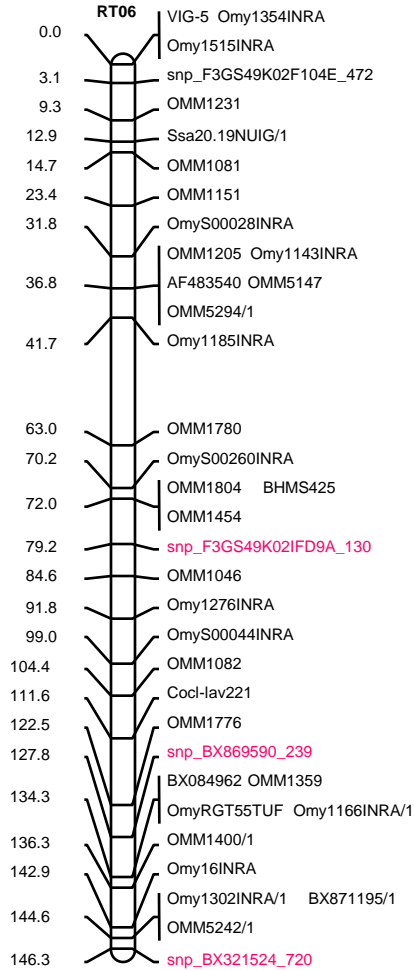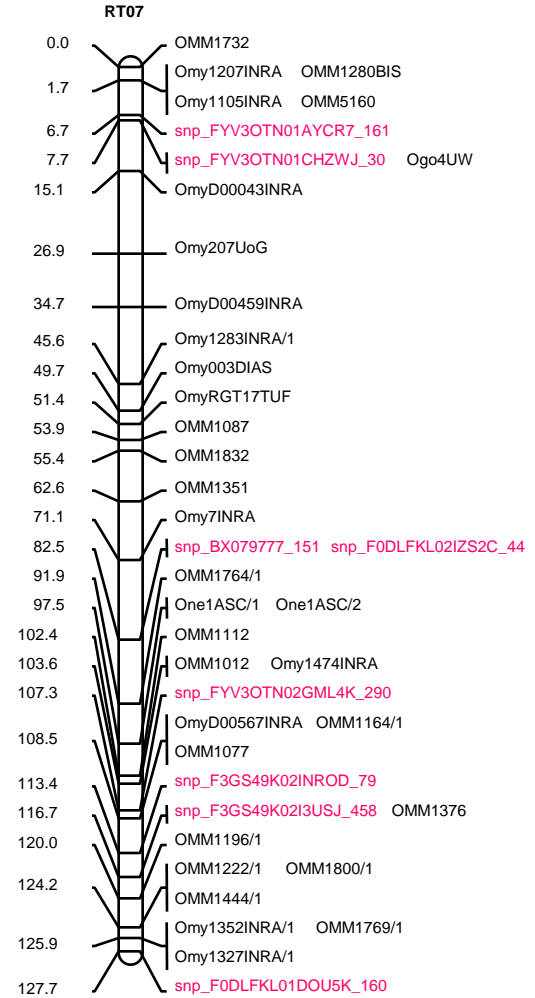

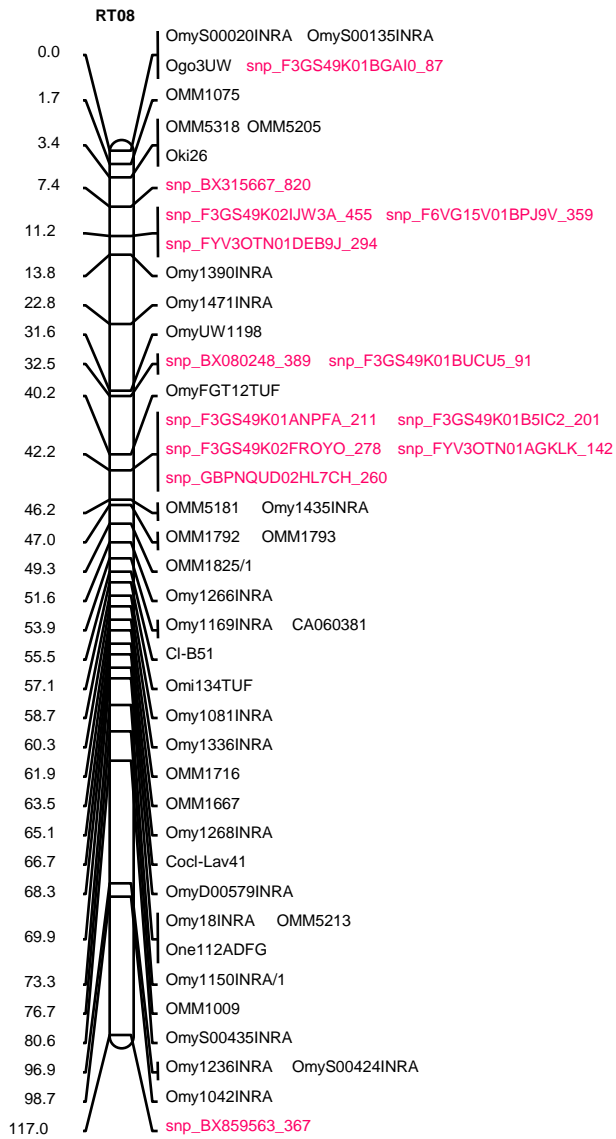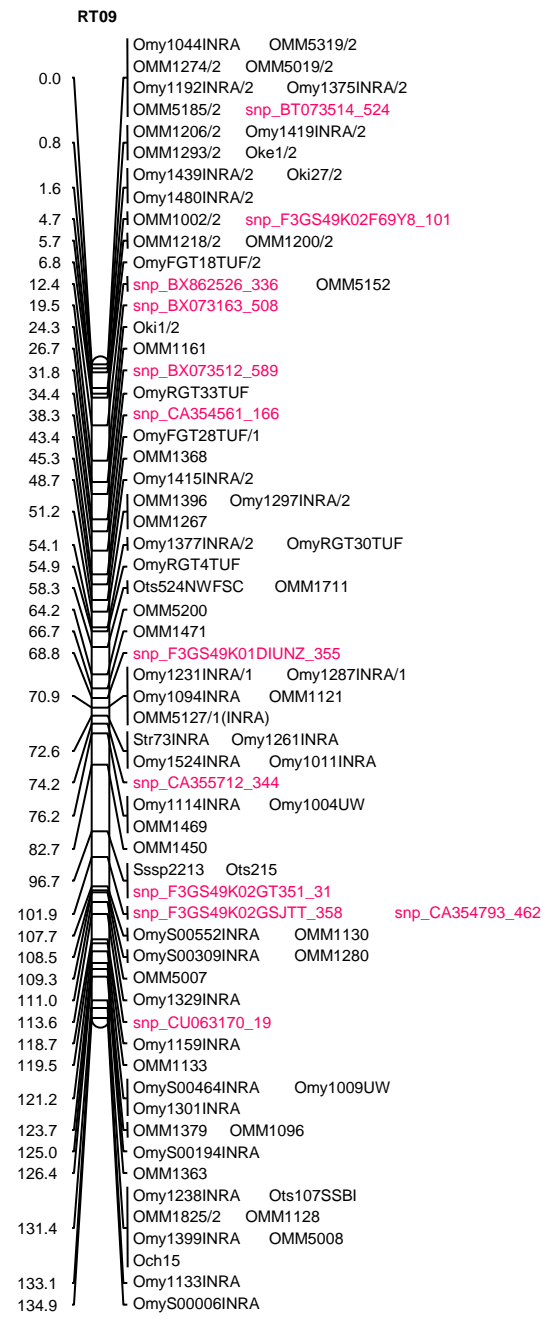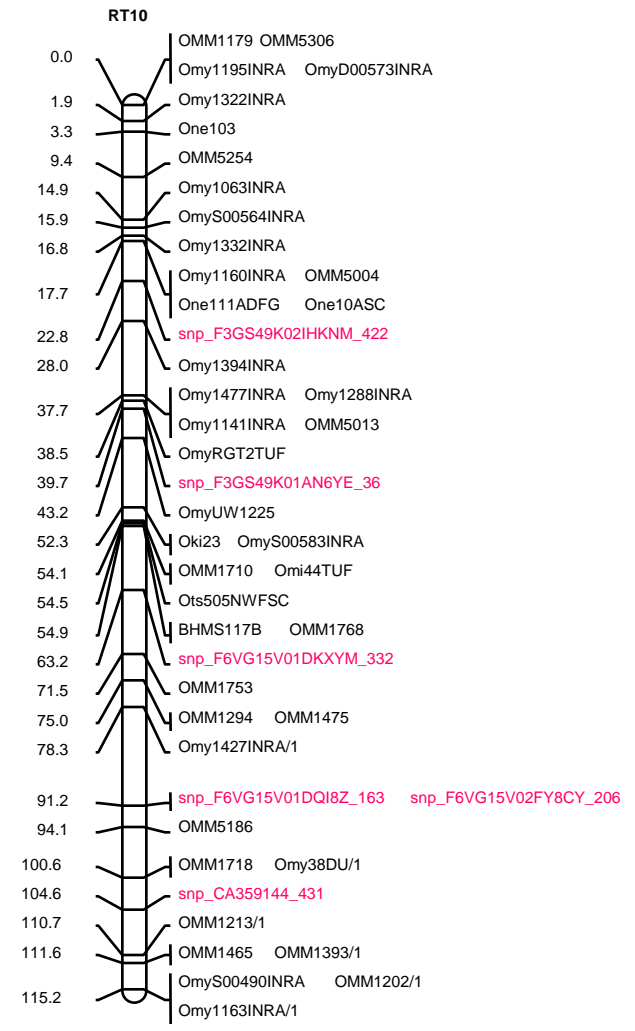

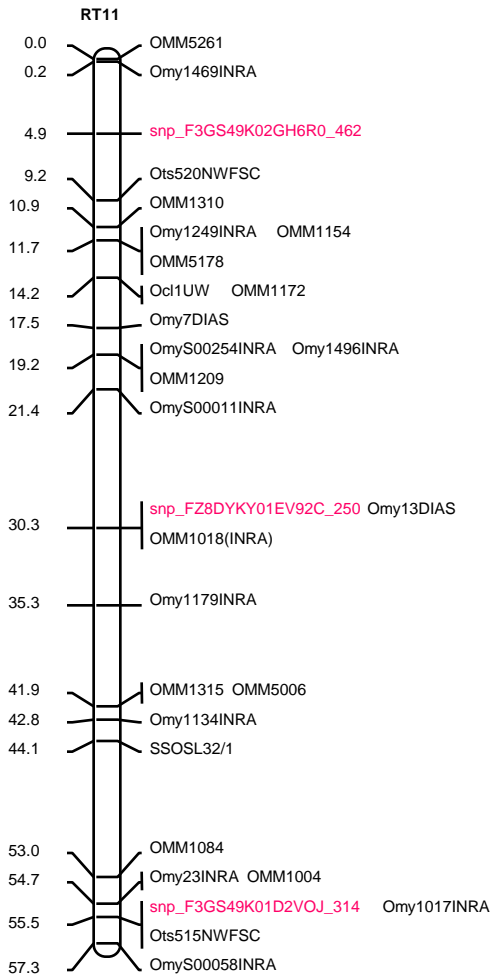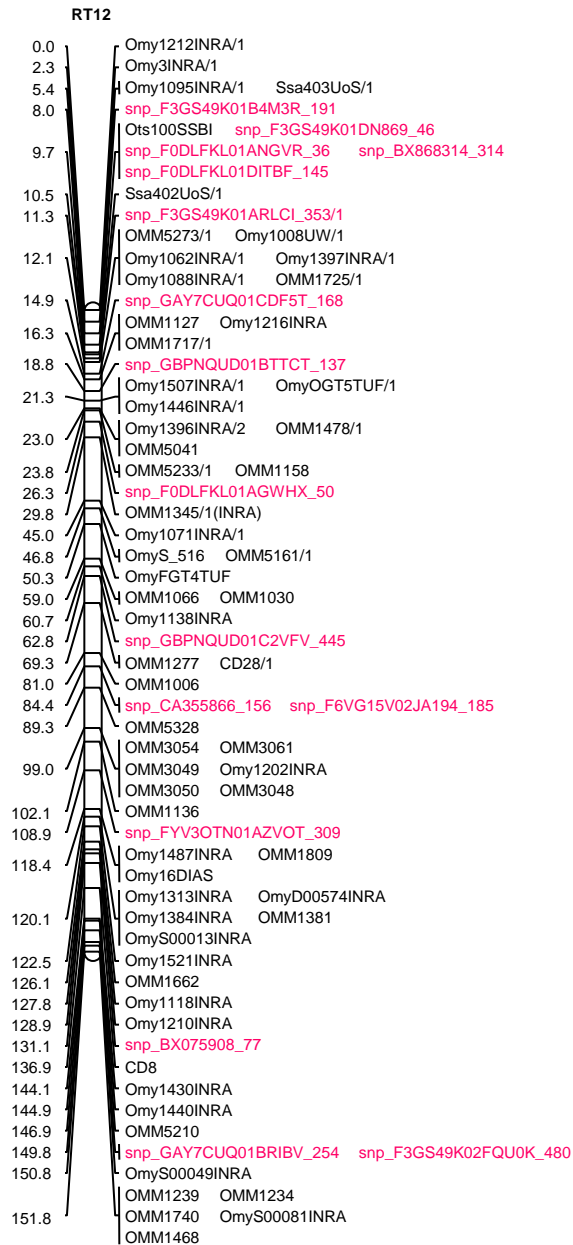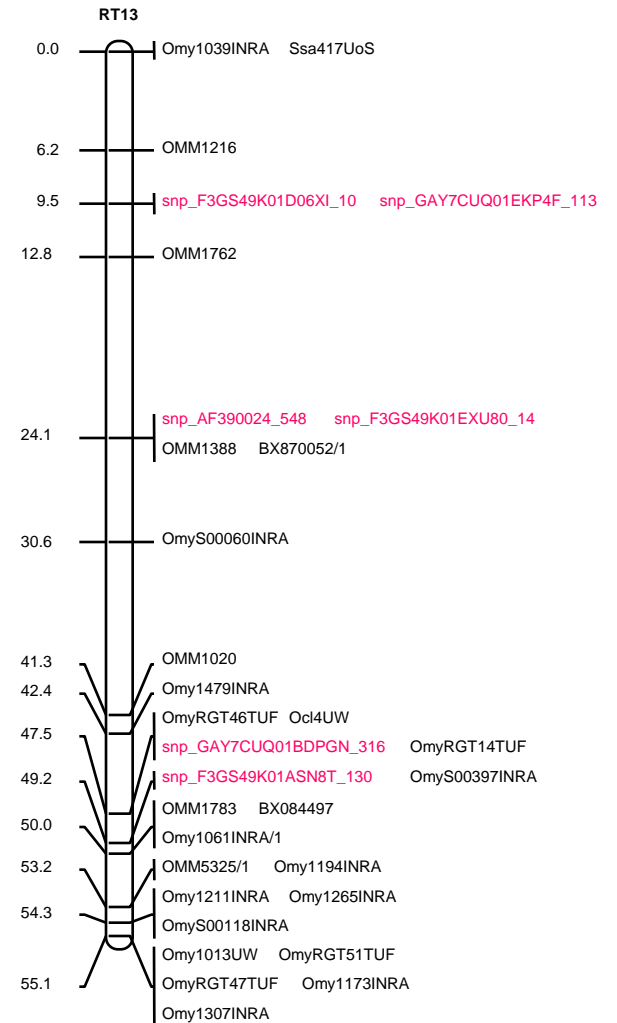

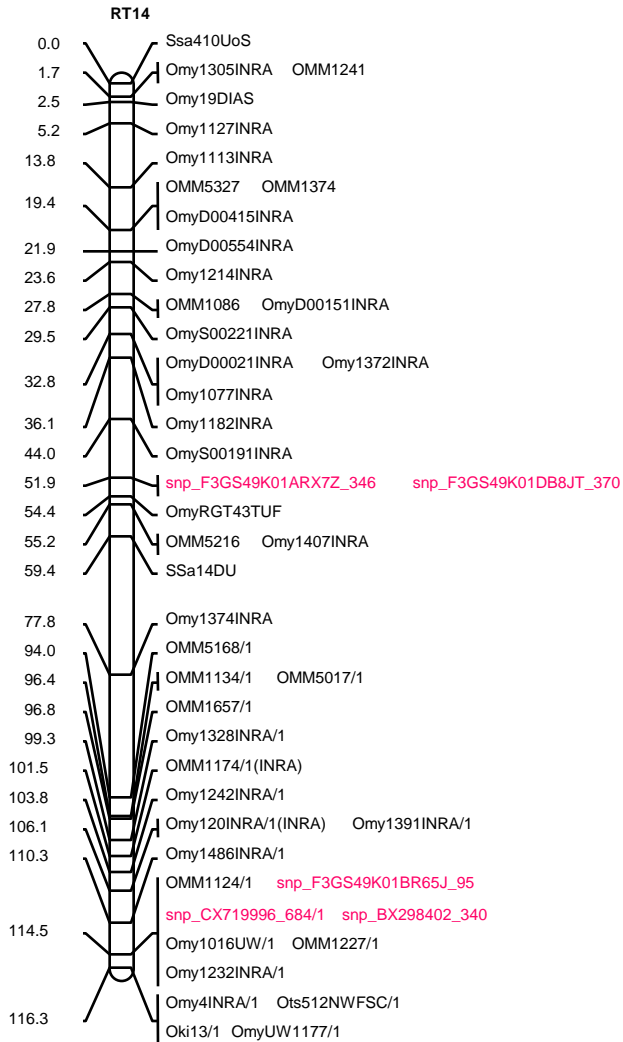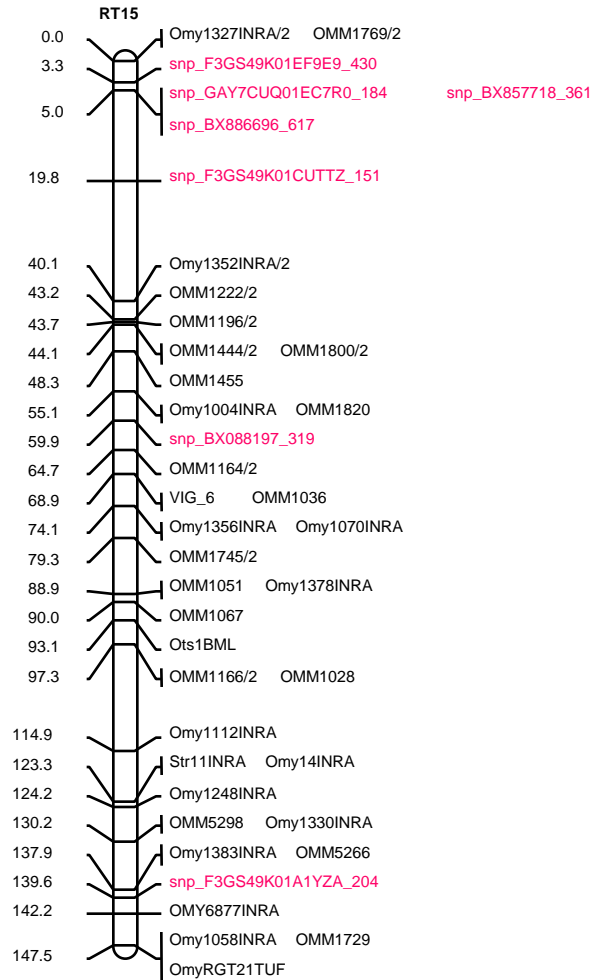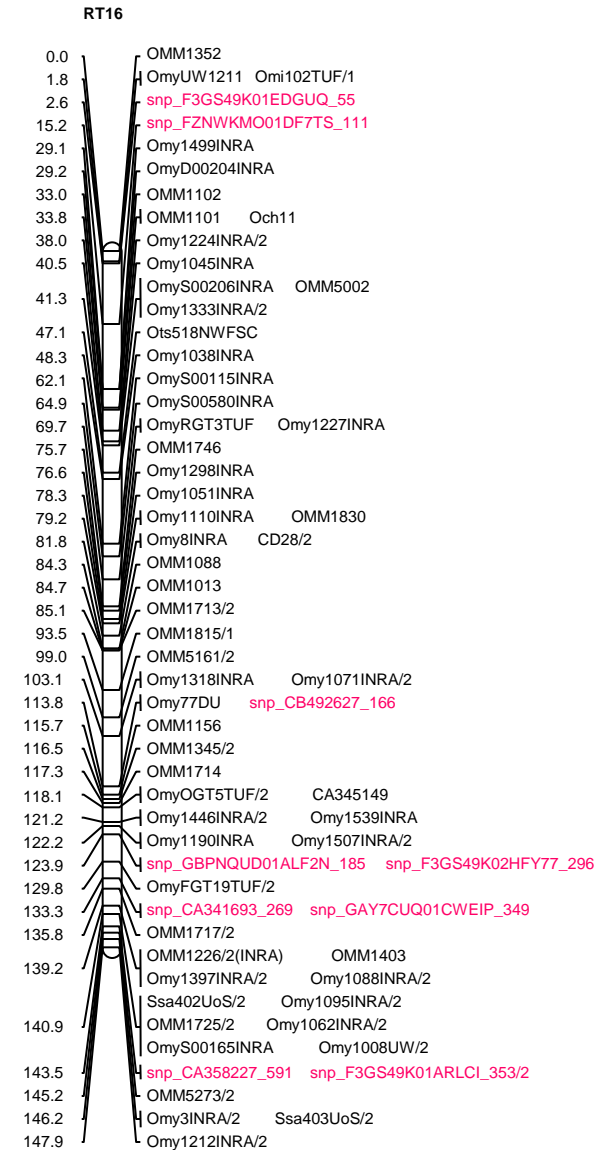

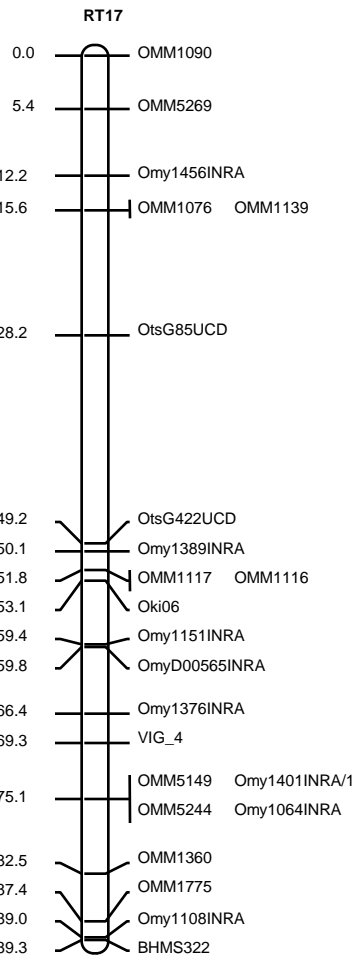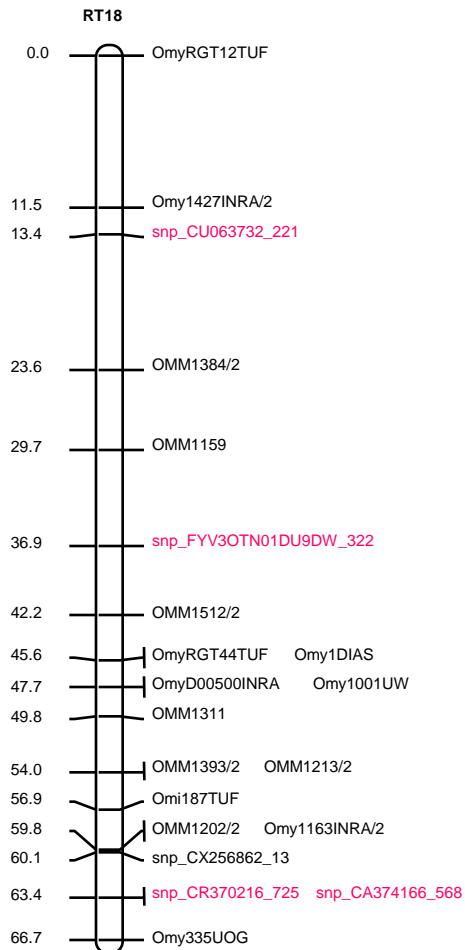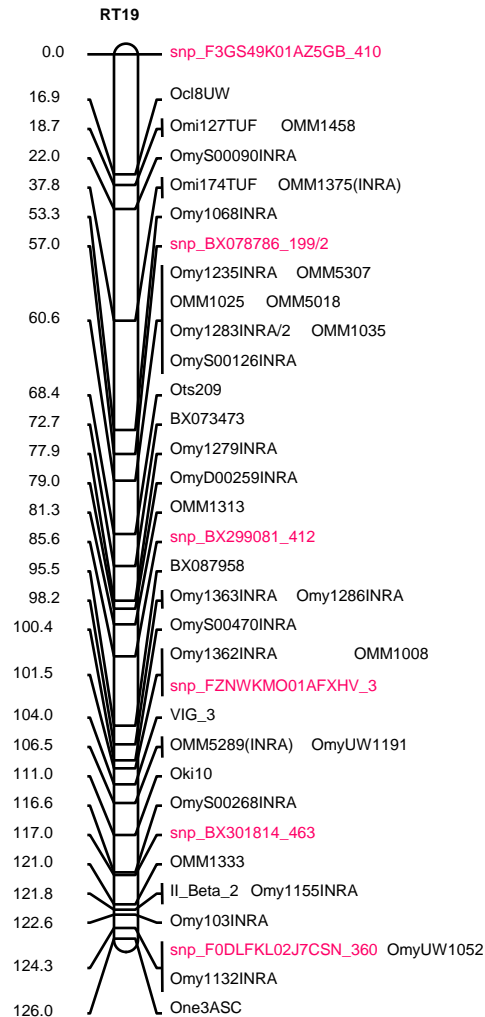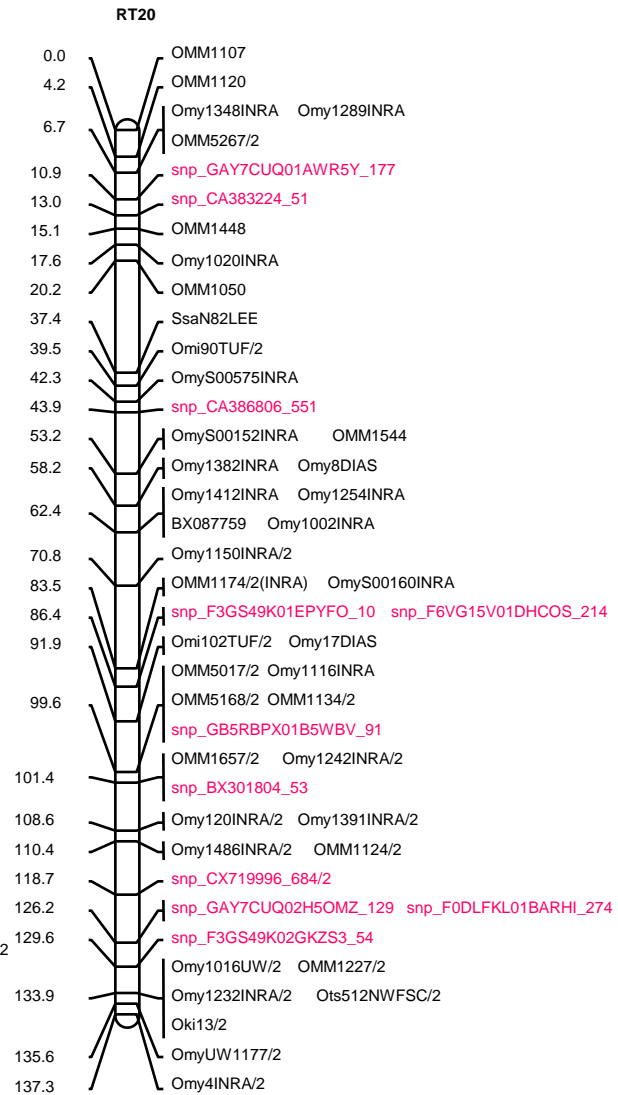

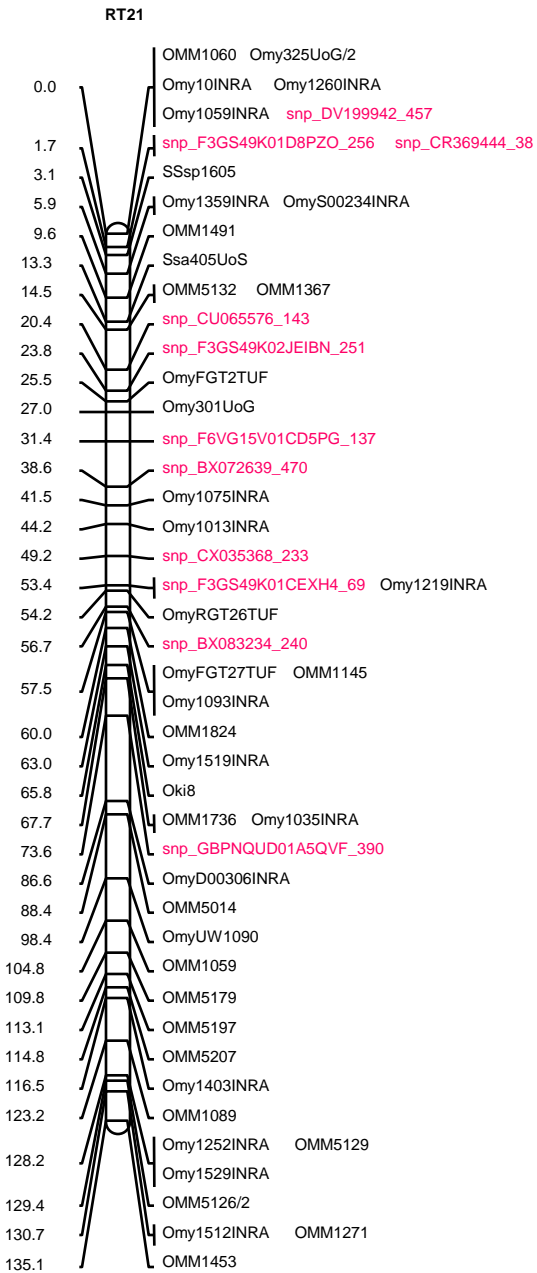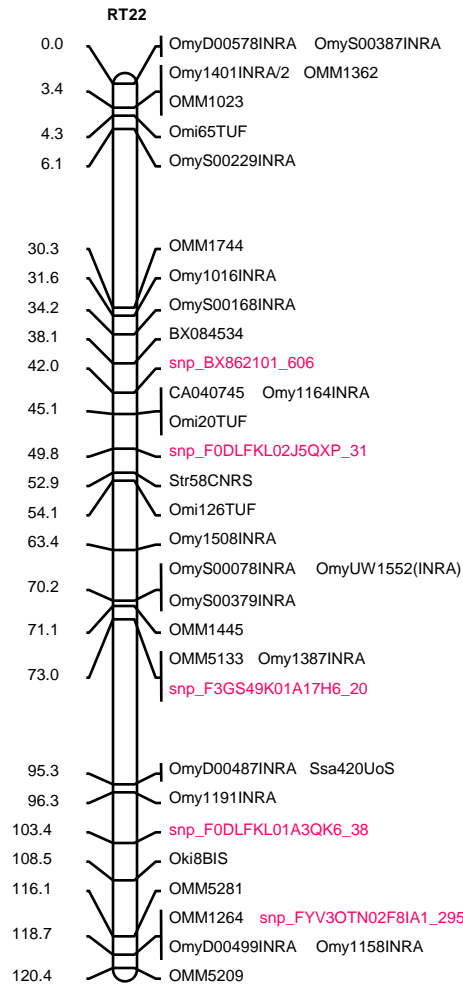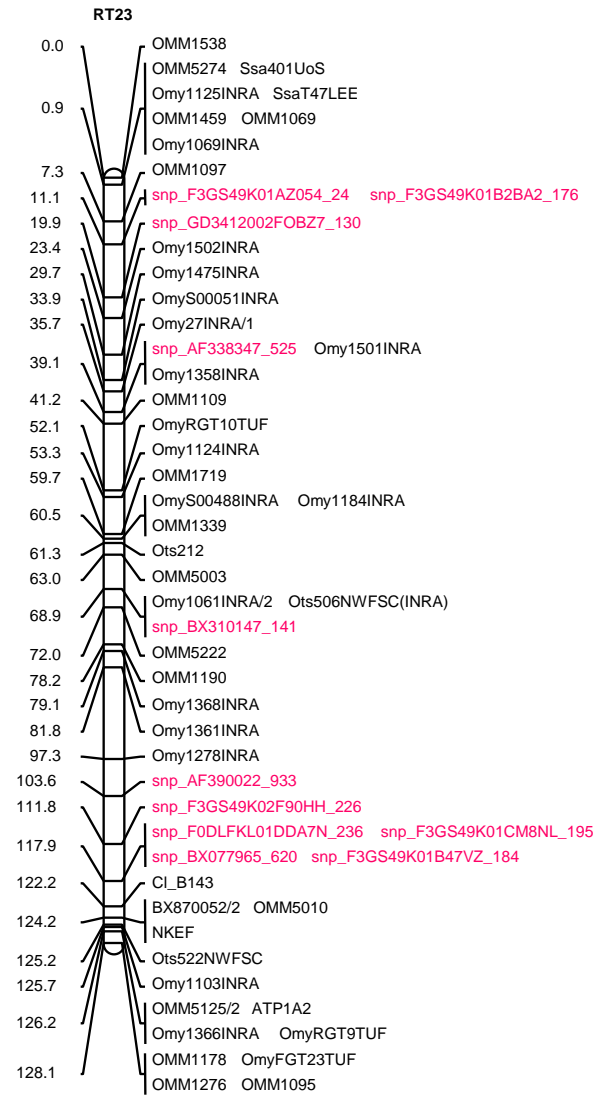

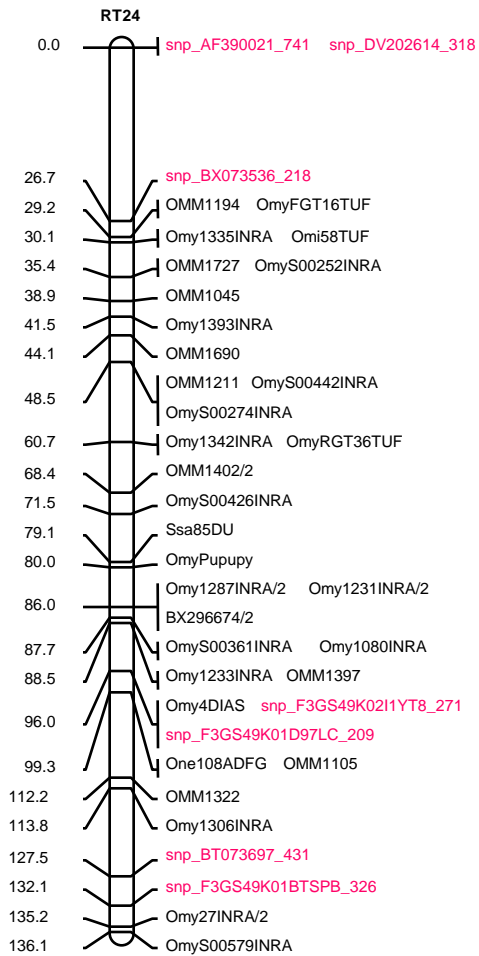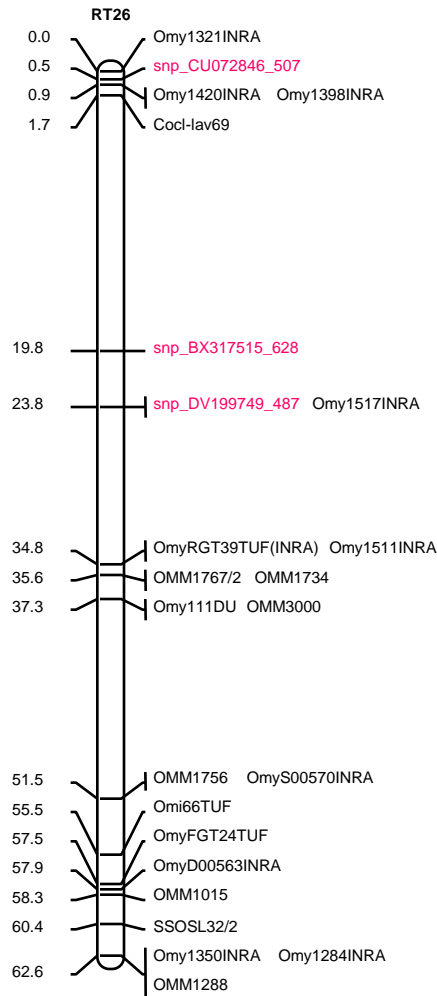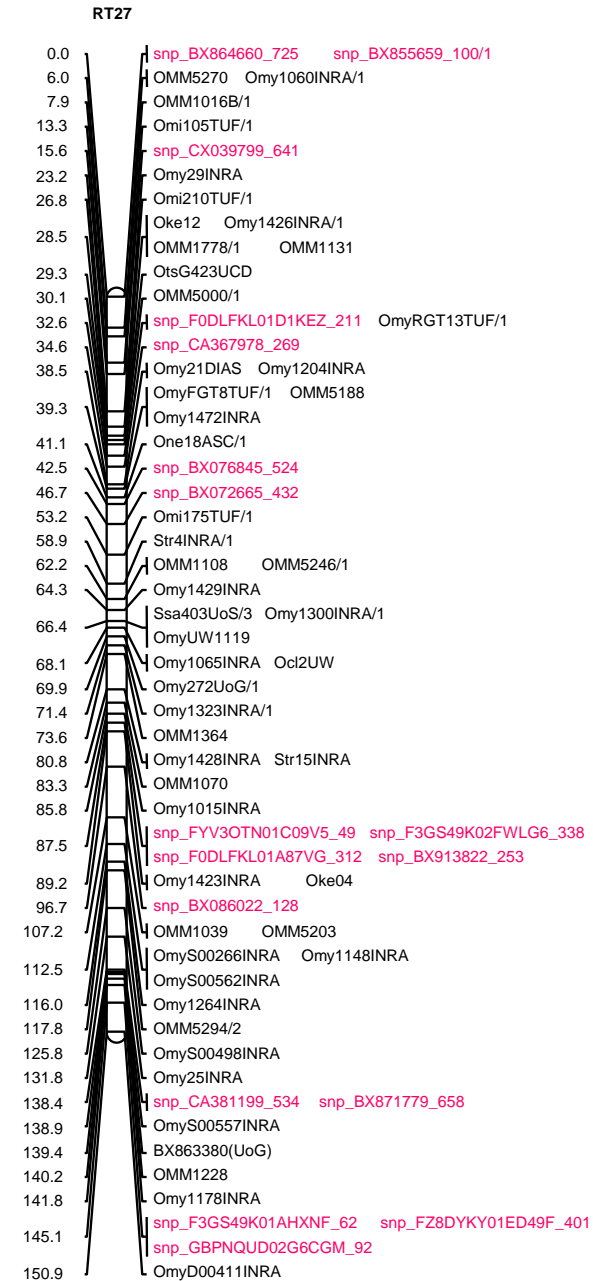



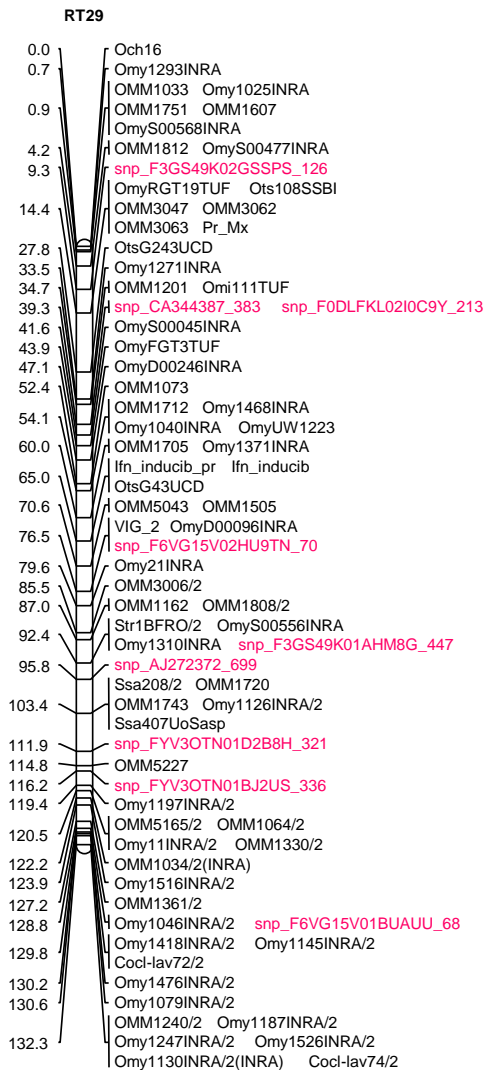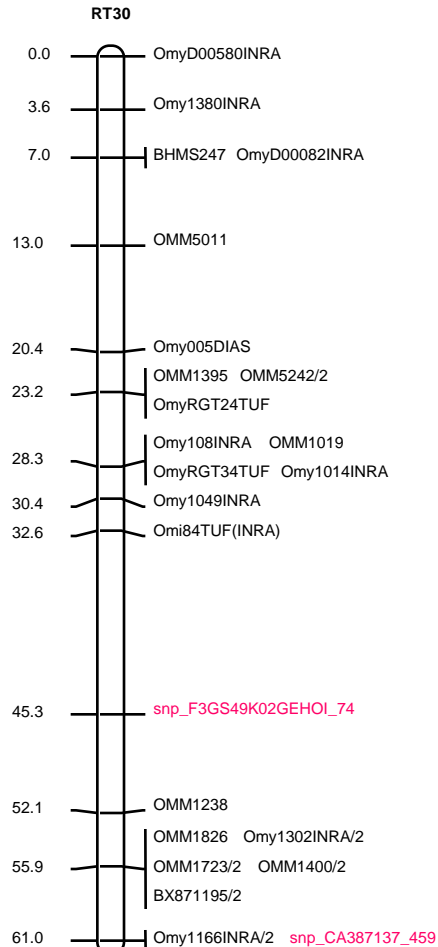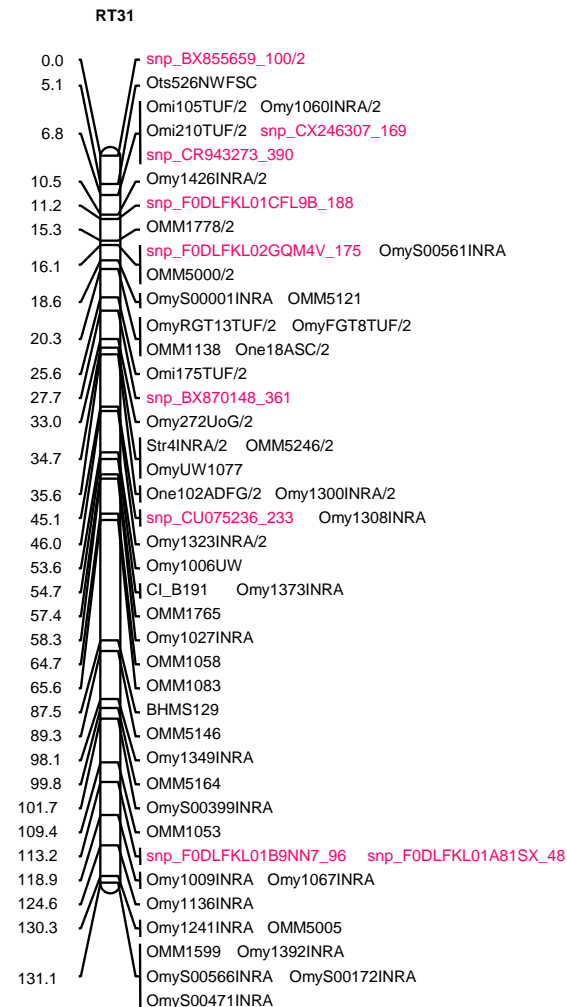

Supplement: 1471-2164-13-238-S6.pdf [file 1471-2164-13-238-S6.pdf]
